1

# 2 Sex differences in allometry for phenotypic traits 3 indicate that females are not scaled males

4

5 Laura A. B. Wilson<sup>1,2\*</sup>, Susanne R. K. Zajitschek<sup>1,3</sup>, Malgorzata Lagisz<sup>1</sup>, Jeremy Mason<sup>4,5</sup>,  
6 Hamed Haselimashhadi<sup>5</sup> Shinichi Nakagawa<sup>1\*</sup>

7

8 <sup>1</sup>Evolution & Ecology Research Centre, UNSW Data Science Hub, and School of Biological,  
9 Earth and Environmental Sciences, University of New South Wales, Sydney, Australia

10 <sup>2</sup>School of Archaeology and Anthropology, The Australian National University, Canberra,  
11 Australia

12 <sup>3</sup>School of Biological and Environmental Sciences, Liverpool John Moores University,  
13 Liverpool, UK

14 <sup>4</sup>Melio Healthcare Ltd., City Tower, 40 Basinghall St., EC2V 5DE, London, UK

15 <sup>5</sup>European Molecular Biology Laboratory, European Bioinformatics Institute (EMBL-EBI),  
16 Wellcome Genome Campus, Hinxton, Cambridgeshire, CB10 1SD, UK

17 \*correspondence: [laura.wilson@anu.edu.au](mailto:laura.wilson@anu.edu.au); [s.nakagawa@unsw.edu.au](mailto:s.nakagawa@unsw.edu.au)

18

19

20

21

22

23 **Abstract**

24 Sex differences in the lifetime risk and expression of disease are well-known. Paradoxically,  
25 preclinical research targeted at improving treatment, increasing health span and reducing  
26 the financial burden of health care, has mostly been conducted on male animals and cells.  
27 Females are assumed to be the same or scaled versions of males, yet sex differences in the  
28 allometric relationship between phenotypic traits and body size, needed to evaluate the  
29 validity of this assumption, have not been established. We quantify allometry for 297  
30 phenotypic traits in male and female mice, recorded in >2.1 million measurements from the  
31 International Mouse Phenotyping Consortium. We find sex differences in allometric  
32 parameters (slope, intercept, residual SD) are common. Thus, the allometric relationship  
33 varies between the sexes: females are not scaled males. Our results support a complex,  
34 trait-specific patterning of sex differences in phenotypic traits, promoting case-specific  
35 approaches to therapeutic intervention and drug dosage scaled by body weight.

36

37

38

39 Keywords: biomarker, sex differences, static allometry, animal model, drug reactions

40

## 41 **Introduction**

42 A historic use of male animals in preclinical research and male participants in clinical trials  
43 has resulted in a significant bias in healthcare systems around the world (Holdcroft, 2007).  
44 The knowledge available on many diseases, their manifestation, time course and the  
45 efficacy of treatment options, is highly skewed in favour of males. The need to reach parity of  
46 the sexes in biomedical research and to conduct sex-specific analysis of research results  
47 has been widely acknowledged (Mogil & Chanda, 2005; Rogers et al., 2008; Kim et al.,  
48 2010; Beery & Zucker, 2011; Klein et al., 2015). Efforts to address this issue initially resulted  
49 in legislative changes around clinical research, requiring female participants in government-  
50 funded clinical trials (e.g., NIH, 1993; Correa-de-Araujo, 2006; Klinge, 2008). Modest  
51 improvement to rebalancing representation of the sexes in clinical trials (Zucker & Beery,  
52 2010; Mazure & Jones, 2015; Feldman et al., 2019) has been bolstered by recent revisions  
53 to government guidelines in the US for preclinical research, requiring biological sex to be  
54 included as a study variable (Clayton & Collins, 2014).

55

56 Basing healthcare decisions for women based on research conducted on men (and vice  
57 versa, e.g., Wiemann et al., 2007) potentially has profound consequences (Kim et al., 2010;  
58 Oh et al., 2015; Tannenbaum et al., 2019). Studies have established that the nature of  
59 disease experience and benefits of treatment differ between men and women (Rahore et al.,  
60 2002; Gandhi et al., 2004; Canto et al., 2007; Whitley et al., 2009; Wallach et al., 2016;  
61 Mauvais-Jarvis et al., 2020). These differences manifest in major pillars of healthcare,  
62 impacting cost associated with care and its quality (Wainer et al., 2020). For example, sex  
63 differences in pharmacokinetics mean that therapeutic decisions based on studies with male  
64 subjects may lead to increased magnitudes of adverse drug reactions in women (Nakagawa  
65 & Kajiwara, 2015, Yu et al. 2016). Similarly, the broadly divergent behaviour of male (anti-  
66 inflammatory) and female (pro-inflammatory) immune systems translates to antibody  
67 response variability, with some vaccines resulting in a stronger immune response in males  
68 compared to females (Bouman & Heineman, 2005; Cook, 2008; Klein, 2013; Flanagan,  
69 2014). Moreover, pathophysiological differences between the sexes lead to women being  
70 underdiagnosed or undertreated for leading causes of mortality, such as cardiovascular  
71 disease and Type 2 diabetes (Mauvais-Jarvis et al., 2020).

72

73 With the growing recognition of the importance of sex in biomedicine, a sharper focus on the  
74 topic has revealed that some of the initial assumptions and concerns surrounding use of  
75 female animals in preclinical research, such as their propensity for greater variation  
76 associated with the oestrous cycle (Shansky, 2019), lack empirical support (Mogil & Chanda,  
77 2005; Prendergast et al., 2014; Zajitschek et al. 2020). Nevertheless, questions have been

78 raised about the value of including female animals in preclinical research, citing a negative  
79 impact on the burden of evidence for therapeutic interventions (Fields 2014) and a lack of  
80 clarity surrounding the extent to which sex differences may be explained by sex-linked  
81 variables, such body mass index or body weight differences between the sexes (Richardson  
82 2015).

83

84 Building on empirical studies that have sought to establish the nature of sex differences in  
85 biomedicine and to clarify the assumptions surrounding preclinical (Mogil & Chanda, 2005;  
86 Becker et al., 2016; Karp et al., 2017; Zajitschek et al., 2020) and clinical (Campesi et al.,  
87 2021) research data collected on males and generalized to females, we here tackle the  
88 extent to which females can be considered ‘small’ males in biomedicine. This is a pervasive  
89 narrative that impacts research design.

90

91 We adopt the framework of static allometry, the measurement of trait covariation among  
92 individuals of different size at the same developmental stage, following Huxley (1924, 1932),  
93 who proposed an equation to model simple allometry. This equation expresses the growth of  
94 two traits,  $x$  and  $y$ , when regulated by a common growth parameter:  $y = ax^b$ , or equivalently  
95  $\log y = \log(a) + b \log(x)$ , where the ratios between the components of the growth rates of  $y$   
96 and  $x$  correspond to intercept  $\log(a)$  and a slope  $b$  (Pélabon et al., 2013). We quantify the  
97 relationship between phenotypic trait and body weight in males and females, statistically  
98 evaluating scenarios that describe the magnitude and patterning of sex differences across  
99 297 traits in over 2 million mice from the International Mouse Phenotyping Consortium  
100 (IMPC, [www.mousephenotype.org](http://www.mousephenotype.org); Dickinson et al., 2016).

101

102 By providing empirical data on static allometry across phenotypic traits that represent  
103 preclinical parameters (e.g., immunology, metabolism, morphology), we aim to clarify if, and  
104 the extent to which, trait values for males may be scaled to match those of females. That is,  
105 we tackle the assumption that females are small males and identify, for the first time, the  
106 trait-specific features of the allometric relationship. We discuss these data considering the  
107 discourse on the generalization of male data in preclinical research (Usui et al. 2021), as  
108 well as their evolutionary implications, leveraging a large, wildtype dataset to illuminate  
109 microevolutionary trends in static allometry. Consideration of the evolutionary context  
110 surrounding sex differences may augment understanding of how disease state phenotypes  
111 emerge or persist in a population (Morrow & Connallon, 2013; Morrow, 2015). Data on  
112 allometric scaling also relate to one of the most salient aspects of sex differences, those  
113 concerning adverse drug reactions (ADRs) and the so far unanswered question of whether

114 weight-adjusted doses would suffice to offset the majority of sex-specific ADRs (Zucker &  
115 Prendergast, 2020).  
116

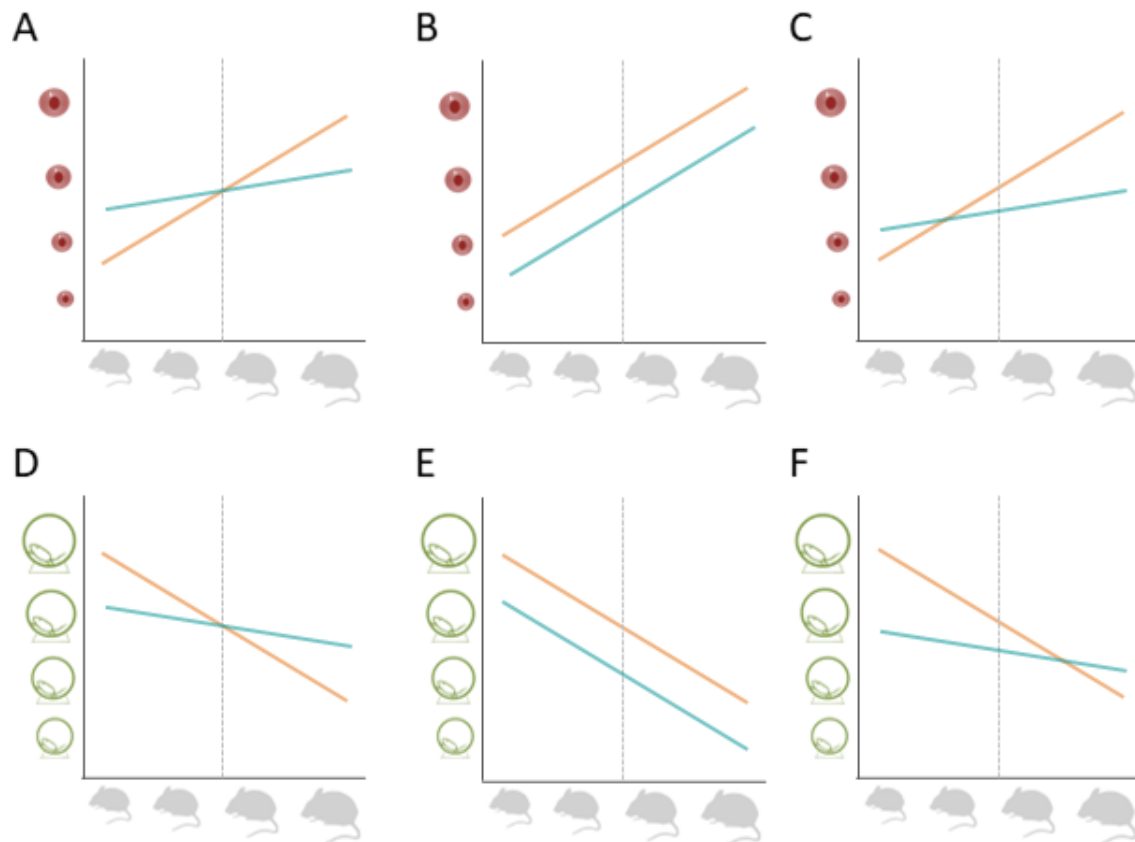

117  
118 **Figure 1.** Examples of scenarios of sex differences in a trait of interest ~ weight allometric relationship. Top row  
119 shows a hypothetical positive relationship between body weight and eye size and the bottom row negative  
120 relationship between body size and activity. Body weights are scaled and centred so that the intercept is at the  
121 trait mean represented by a grey dashed line. A) Different positive slopes for the sexes, but same intercepts. B)  
122 Same positive slopes for both sexes, but different intercepts. C) Different positive slopes for both sexes, and  
123 different intercepts. D) Different negative slopes for the sexes, but the same intercepts. E) Same negative slopes  
124 for both sexes, but different intercepts. F) Different negative slopes for both sexes and different intercepts.

125

## 126 **Results**

### 127 ***Data characteristics***

128 Following initial data cleaning and filtering procedures, the dataset comprised 297  
129 phenotypic traits with a median sample size of 1,585 mice per trait ( $n = 2,104,527$ ).  
130 Representation of males and females was highly similar across most phenotypic traits, with  
131 fewer than 10% of traits (29/297) displaying greater than 5% difference in sample size  
132 between males and females. The traits were collated into nine functional groupings following  
133 Zajitschek et al. (2020) (see Methods): behaviour (57 traits,  $n = 484,207$ ), eye (27 traits,  $n =$   
134 10,366), hearing (16 traits,  $n = 201,220$ ), heart (27 traits,  $n = 196,777$ ), hematology (25 traits,

135 n = 300,699), immunology (79 traits, n = 89,952), metabolism (9 traits, n = 111,659),  
136 morphology (24 traits, n = 364,484), and physiology (33 traits, n = 345,163).

137

138 The 297 phenotypic traits were further filtered for non-independence of traits, so that  $p$   
139 values were merged for traits that were related to one another, resulting in a reduced data  
140 set of 181 traits, with a median sample size of 4,044 individuals per trait.

141

#### 142 ***Linear mixed-effects models for static allometry***

143 Our linear mixed-effects models indicated that 8 out of 181 traits (4%) (13 / 297 traits for  
144 unmerged  $p$ -values) are associated with scenario A (different slope, same intercept, Fig. 1A,  
145 1D); most of these traits belonged to immunology and heart functional groups. Note that the  
146 intercept for each sex was set so that we compared mean values for each sex for a given  
147 trait. Scenario B (same slope, different intercept, Fig. 1B, 1E) was supported for 70 / 181  
148 (39%) traits (125 / 297 traits for unmerged  $p$ -values). For scenario C (different slope,  
149 different intercept, Fig. 1C, 1F), 69 / 181 (38%) traits were categorized as consistent (86 /  
150 297 traits for unmerged  $p$ -values), and the remaining 34 / 181 (19%) traits showed no  
151 significant differences in slope and intercept between males and females. Overall, when a  
152 statistically significant difference in allometric pattern was present between the sexes,  
153 intercept differences appeared more common than slope differences (39% compared to 4%  
154 traits), however both slope and intercept differences were also similarly common (38%). Just  
155 under a fifth of traits showed no significant differences between males and females,  
156 indicating that, for most traits, sex differences in allometric patterning represent a significant  
157 source of variation in trait values.

158

159 Taken together, traits in all functional groups showed statistically significant ( $\alpha = 0.05$ ) sex  
160 differences. Slope differences between the sexes (scenario A) were most common in  
161 immunology and heart groups, while intercept differences (scenario B) were most common  
162 for traits in the behaviour and heart functional groups. Traits exhibiting both slope and  
163 intercept differences between the sexes (scenario C) were most commonly found in the  
164 metabolism and physiology functional groups. Non-significant differences in slope and  
165 intercept were most common among traits in the behaviour and morphology functional  
166 groups.

167

#### 168 ***Sex bias in allometric parameters***

169 Sex bias in the slope and intercept values, in addition to the magnitude of variance (residual  
170 SD), showed considerable variability across functional groups, suggesting trait-specific  
171 patterning of sex differences. For scenario A, representing traits with significant differences

172 in slope, most traits showed greater slope magnitudes for males ( $n = 6$  traits), rather than for  
173 females ( $n = 4$  traits) (Fig. 2A). For scenario B, females showed greater intercept  
174 magnitudes for morphology, immunology, eye and behaviour functional groups ( $n = 45$   
175 traits), whereas males showed greater intercepts for traits in physiology, metabolism,  
176 hematology, heart and hearing functional groups ( $n = 32$  traits) (Fig. 2B). Overall sex bias  
177 (65 male traits: 60 female traits, Fig. 2B) was slightly greater for intercept differences,  
178 compared to slope differences (7 male traits: 6 female traits, Fig. 2A). Scenario C, which  
179 represents significant slope and intercept parameter differences between the sexes, was  
180 predominated by mixed bias across five out of nine functional groups ( $n = 24$  traits),  
181 indicating that most functional groups contained traits that showed a mixture of directional  
182 differences in bias, comprising a combination of male bias in one parameter (slope or  
183 intercept) and female bias in the other parameter (slope or intercept) (Figure 2C).  
184 Immunology-related traits represent an exception under scenario C, whereby traits with  
185 significant differences between the sexes did not show a mixed bias for slope and intercept  
186 values. Across functional groups, male bias is slightly more common (5 groups) than female  
187 bias (4 groups) for statistically significant sex difference in residual SD, indicating that where  
188 traits show differences between the sexes, it is more common for males to be more variable  
189 than females, than *vice versa* (Figure 2D) (133 male traits: 71 female traits).  
190

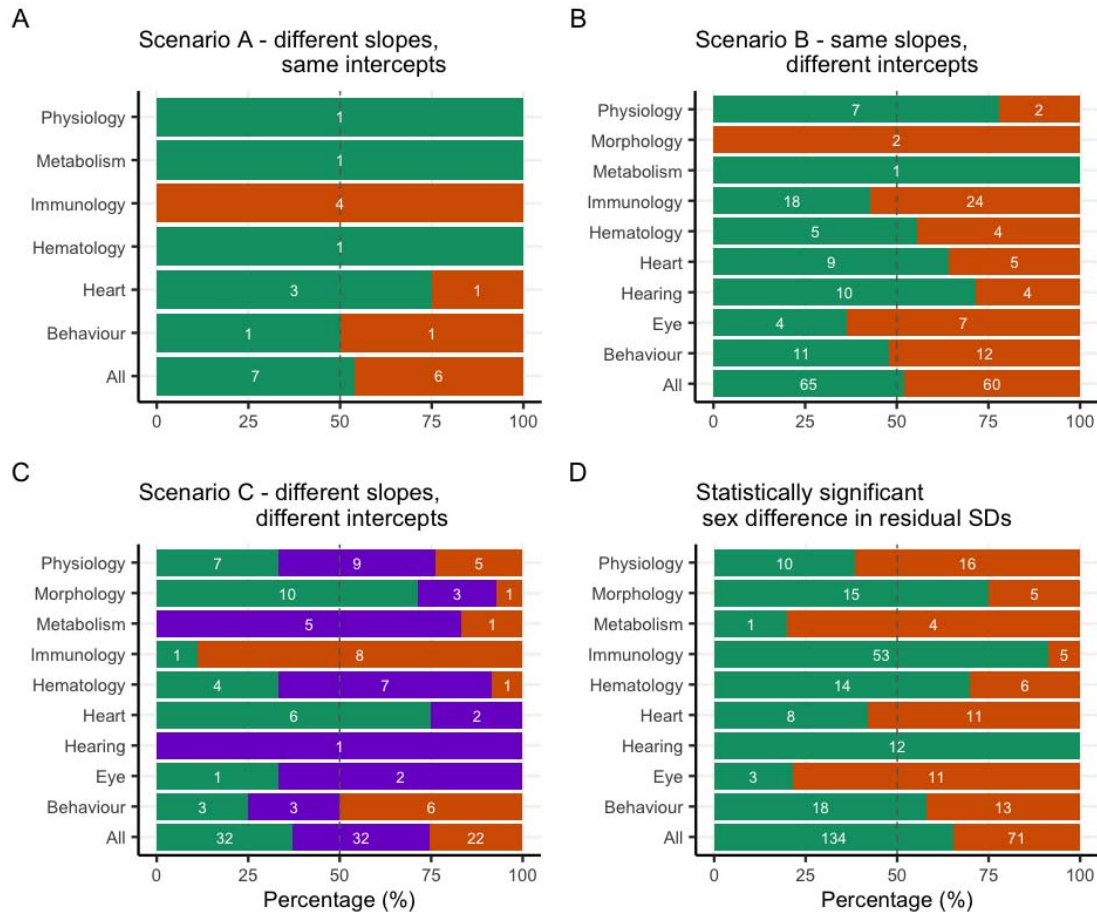

191

192

**Figure 2.** Sex biases for mice phenotypic traits arranged in functional groups. Colours represent significant

193

differences in trait values between the sexes (green – male biased, orange – female biased) for allometric slope

194

(scenario A), intercept (scenario B) or slope and intercept, including traits with mixed (purple) significant

195

differences (i.e. male-biased significant slope and female-biased significant intercept, or female-biased significant

196

slope and male-biased significant intercept) (scenario C), and bias in statistically significant difference in variance

197

(residual SD) between the sexes (D). The number of traits that are either female biased (relative length of orange

198

bars) or male biased (relative length of green bars) are expressed as a percentage of the total number of traits in

199

the corresponding group. Numbers inside the green bars represent the numbers of traits that show female bias

200

within a given group of traits, values inside the orange bars represent the number of male biased traits, and those

201

inside the purple bars represent a combination of female bias (for intercept or slope) and male bias (for intercept

202

or slope).

203



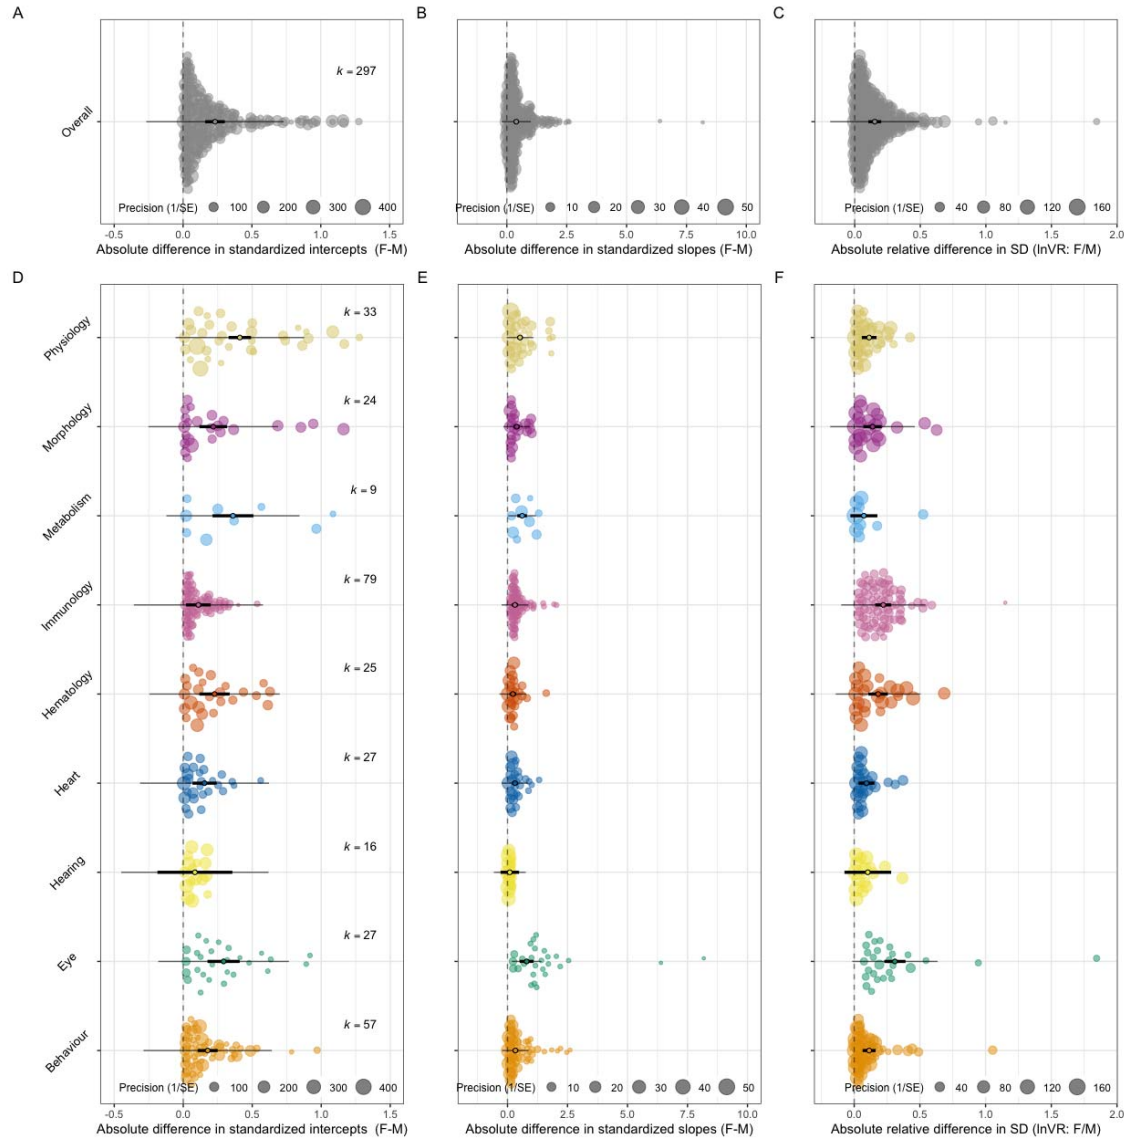

204

205

206 **Figure 3.** Orchard plots illustrating results of multivariate meta-analysis based on differences between male and  
 207 female absolute values for allometric intercept (A, D), slope (B, E) and residual variance (SD) (C, F). Plots in  
 208 greyscale (top row) show overall differences (A – C), and plots below, in colour, show separate results for each  
 209 functional group (D – F). Orchard plots show model point estimate (black open ellipse) and associated  
 210 confidence interval (CIs) (thick black horizontal line), 95% prediction intervals (PIs) (thin black horizontal line),  
 211 and individual effect sizes (filled ellipses), which are scaled by their precision, defined as: precision = 1 /  
 212 Standard Error (SE) (see Nagakawa et al., 2021).

213

### 214 **Meta-analysis and meta-regression of sex differences in slope, intercept and variance**

215 Multi-level meta-analysis of absolute values in allometric slope and intercept, and variance,  
 216 revealed significant differences between the sexes (Fig. 3A – C), with the greatest effect size  
 217 evident for intercept value (Fig. 3A). Across functional groups, there was variability in the

218 magnitude of absolute difference between the sexes, both within parameters (i.e., intercept)  
219 and across parameters. For absolute differences in intercept, traits within the physiology  
220 functional group showed greatest model point estimate difference between males and  
221 females, whereas those within the hearing group showed the smallest magnitude of  
222 difference (Fig. 3D). For differences in slope, which showed lower inter-trait variability than  
223 differences in intercept, the largest model point estimate difference was observed for eye  
224 traits, and the smallest difference for hearing traits (Fig. 3E).

225

226 Similarly, for relative difference in residual SD, eye traits showed the largest amount of  
227 dimorphism, whereas heart and metabolism traits were most similar in SD values between  
228 the sexes (Fig. 3F). Overall, across all parameters (intercept, slope and SD), confidence  
229 intervals (CIs) for hearing traits were the only ones to consistently overlap with zero, showing  
230 no statistically significant difference between the sexes (Fig. 3D, E, F). For traits within a  
231 given functional group, there was considerable variability in the magnitude of difference  
232 between the sexes. For sex differences in intercept, inter-trait variability was highest for  
233 physiology, morphology and metabolism groups (Fig. 3D), whereas slope differences  
234 showed most inter-trait variability for eye and behaviour traits (Fig. 3E), and relative  
235 difference in SD was also most variable among traits in eye and behaviour groups (Fig. 3F).

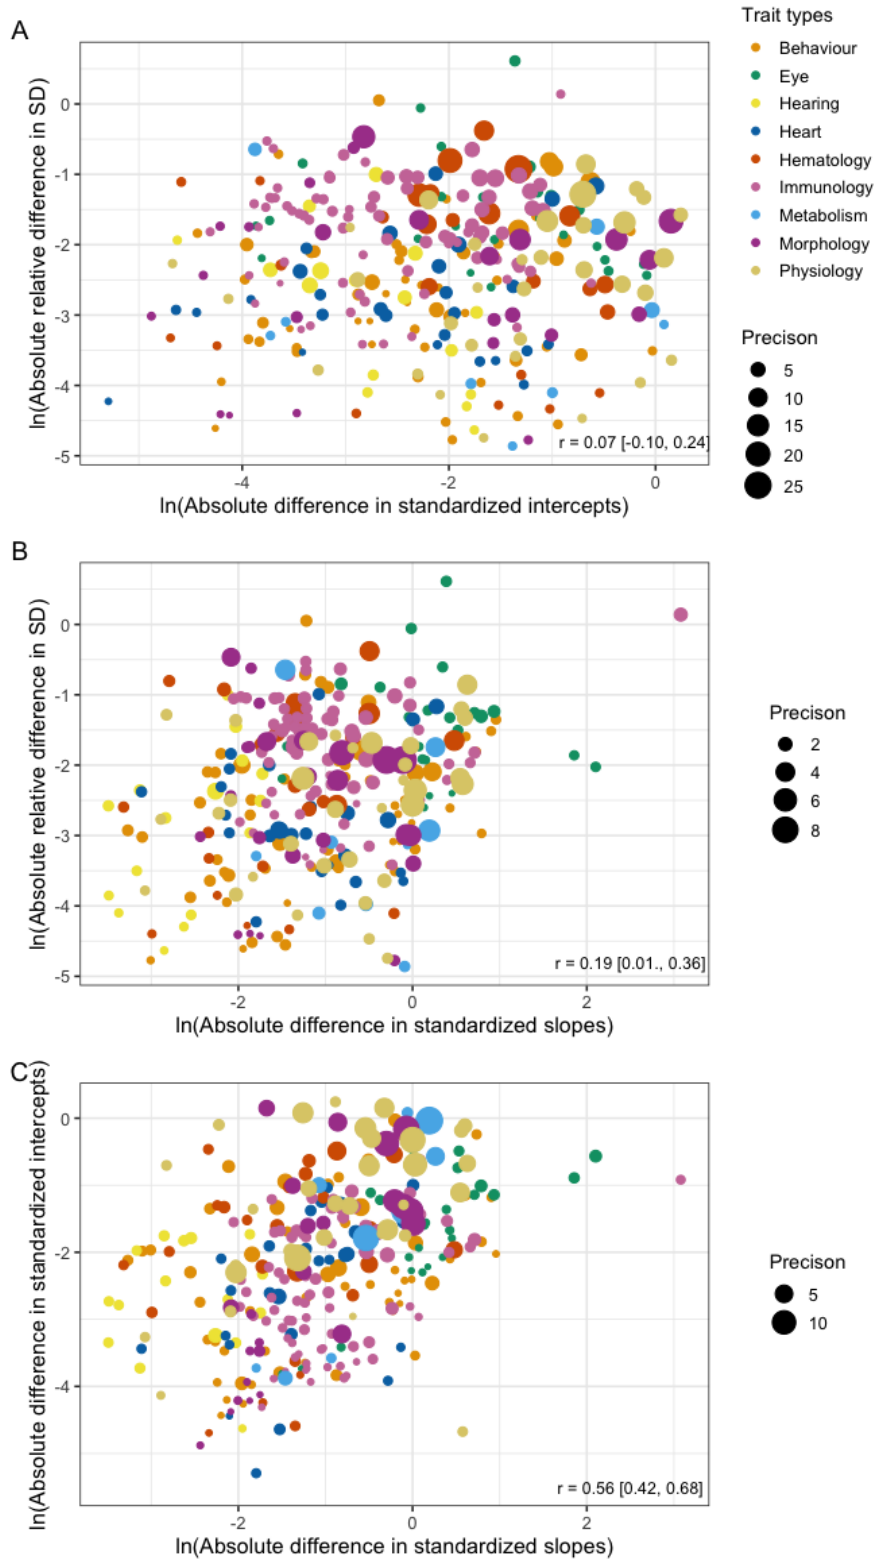

236

237

238

239

240

**Figure 4.** Bivariate ordinations of log absolute difference between males and females for intercept and residual SD (A), slope and residual SD (B), and slope and intercept (C), for biological traits collated into nine functional groups (i.e., Trait types, represented as different circle colours). Individual effect sizes (circles) are scaled by their precision, defined as: precision = 1 / Standard Error.

241

### 242 ***Relationship between slope/intercept and residual variance***

243 Tri-variate meta-regressions and ordinations of the relationships between slope, intercept  
244 and residual variance (Fig. 4) revealed weak correlations between either slope or intercept  
245 and residual variance ( $r = 0.07 - 0.19$ , Fig. 4A – B), indicating that a greater magnitude of  
246 difference between the sexes in either slope or intercept parameter is not strongly  
247 associated with greater trait variance. In contrast, absolute differences between the sexes in  
248 slope and intercept are strongly correlated ( $r = 0.56$ , Fig. 4C), indicating that in cases where  
249 there are significant differences in trait values for males and females, should a difference in  
250 intercept be present, this is likely accompanied by a difference in allometric slope.

251

### 252 **Discussion**

253 Most current medical guidelines are not sex-specific, being informed by preclinical studies  
254 that have been conducted only on male animals (Zucker & Beery, 2010; Kim et al., 2010;  
255 Zucker et al., 2021) under the assumption that the results are equally applicable to females,  
256 or that the female phenotype represents a smaller body size version of the male phenotype  
257 (Buch et al., 2019; Campesi et al., 2021). Our study sought to provide comprehensive  
258 assessment of this assumption for a large dataset of phenotypic traits in mice. We did not  
259 recover strong evidence for the validity of this assumption in a preclinical (mouse) model: we  
260 find that females are not ‘small’ males or, more accurately, not ‘scaled’ males.

261

262 In an era where personalised medicine interventions are within reach and patient-specific  
263 solutions represent a realisable frontier in healthcare (e.g., Jackson & Chester, 2014; Javaid  
264 & Haleem, 2018; Heath & Pechlivanoglou, 2022), it is now well recognised that sex-based  
265 data are much needed to advance care in an equitable and effective manner. The historic  
266 neglect of sex as a study variable means that the natural history and trajectory of treatment  
267 response in women remains opaque for many chronic diseases. As studies that illuminate  
268 the presence and importance of sex differences continue to emerge, many experimental set-  
269 ups that use both sexes continue to eschew downstream testing for sex differences, in part  
270 due to perceived inflation of sample size required for such analyses (Dayton et al., 2016;  
271 Buch et al., 2019; Arnegard et al., 2020; Woitowich et al., 2020).

272

273 Explicit male-female comparisons are needed to clarify the nature of sex differences (Garcia-  
274 Sifuentes & Maney, 2021; Zucker et al., 2021). Here we address this issue through a novel  
275 meta-analytical focus on identifying and characterising allometric scaling relationships for  
276 biological traits on a broad scale. We identify slope parameter ( $b$ ) differences between the  
277 sexes as being common (Fig. 2C, Fig. 3E) and where present, often associated with

278 significant differences in intercept value (Fig. 4C). We therefore demonstrate that the  
279 relationship between trait and body mass in mice differs fundamentally in mode (i.e., change  
280 in inter-trait covariance) between the sexes and that dimorphism cannot be fully explained by  
281 a magnitude shift in intercept value, as would be predicted should female phenotype  
282 represent a scaled version of male phenotype. For traits where there are significant  
283 differences in both slope and intercept between the sexes (Fig. 3C), it is common for a  
284 mixed scenario (male-biased significant slope and female-biased significant intercept, or  
285 female-biased significant slope and male-biased significant intercept; note that intercepts  
286 represent mean values for each sex) to occur. Therefore, for a given trait, a female value  
287 cannot be predicted based on an allometric coefficient extracted from regression data  
288 collected on males. Further, we find a male bias in residual SD for traits in morphology,  
289 immunology, hematology, hearing, and behaviour functional groups (7 out of 9 functional  
290 groups). However, we also find a weak correlation between difference in intercept and  
291 residual SD (Fig. 4A), meaning that allometric scaling differences alone do not explain  
292 increased residual SD in males compared to females. Or, put another way, among traits that  
293 show significant dimorphism in allometric relationships, males do not show greater variance  
294 than females just because they have greater body weights than females.

295

296 Our results complement recent evidence that supports a complex, trait-specific patterning of  
297 sex differences in markers routinely recorded in animal research (Rawlik et al., 2016; Karp et  
298 al., 2017; Zajitschek et al., 2020). Specifically, we build on previous studies using phenotypic  
299 traits from the International Mouse Phenotyping Consortium that have identified that sexual  
300 dimorphism is prevalent among phenotyping parameters (Karp et al., 2017), and moreover  
301 that, contrary to long-held assumption, neither females nor males show greater trait  
302 variability. We here show that the allometric relationship between trait value and body weight  
303 is dimorphic for most traits (75%), and these differences, where present, reflect trait-specific  
304 allometric patterns, involving both slope and intercept changes. As such, for slopes greater  
305 than zero, some trait values increase faster than body weight (positive allometry;  $b > 1$ ) and  
306 some do not increase at the same rate as body weight (negative allometry;  $b < 1$ ).

307

### 308 ***Sex-based scaling in biomedical studies***

309 Our findings likely have implications for drug therapy, and specifically data surrounding the  
310 efficacy of drug dosing scaled by body weight. There exist known sex differences in drug  
311 prescription prevalence and usage patterns, as well as response to drug therapy (Watson et  
312 al., 2019; Malda et al., 2021). The same therapeutic regimen can elicit different responses  
313 due to sex-specific variance in pharmacokinetics and pharmacodynamics profiles (e.g., Yang  
314 et al., 2012; Zakiniaez et al., 2016), arising from underlying physiologic differences. These

315 include, for example, significantly dimorphic traits captured among the physiology group in  
316 our analysis, such as iron (Jiang et al., 2019) and body temperature (van Hoof, 2015),  
317 among the morphology group, such as lean mass and fat mass (Madla et al., 2021), and  
318 among the heart functional group, such as QT interval (time between Q wave and T wave)  
319 (Regitz-Zagrosek & Kararigas, 2017). Population studies have revealed that there is a higher  
320 prevalence of use for most therapeutic drugs in women as compared to men (Fernandez-Liz  
321 et al., 2008; Watson et al., 2019). Further, women are 50 – 75% more likely to experience  
322 Adverse Drug Reactions (ADRs) (Rademaker, 2001), although these are not fully explained  
323 (Koren et al., 2012). Women may be at increased risk of ADRs because they are prescribed  
324 more drugs than men, however women are usually prescribed drugs at the same dose as  
325 men, meaning that they receive a higher dose relative to body weight in most cases. Scaling  
326 of doses on a milligram/kilogram body weight basis has been recommended as a pathway to  
327 reducing ADRs (Zucker & Prendergast, 2020), particularly for drugs that exhibit a steep  
328 dose-response curve (Chen et al., 2020). Indeed, sex differences in ADRs have been  
329 argued to be the result of body weight rather than sex, per se (Richardson et al., 2015). For  
330 both assertions to be supported, we would expect to observe a scenario (here, scenario B)  
331 whereby most or all phenotypic traits exhibit a scaled relationship between males and  
332 females, as a function of body weight. Our results do not provide overwhelming support in  
333 favour of scenario B, but rather support a sex- and trait-specific relationship between weight  
334 and phenotypic traits. This aligns more closely with evidence that weight-corrected  
335 pharmacokinetics are not directly comparable in men and women (Fadiran & Zhang, 2015;  
336 Zucker & Prendergast, 2020), and that many sex differences in ADRs persist after body  
337 weight correction (Greenblatt et al., 2014, 2019). Nevertheless, the Food and Drug  
338 Administration (FDA) has recommended dosage changes for women (e.g., sleep drug  
339 zolpidem; Farkas et al., 2013) and weight adjusted dosing of some drugs, such as antifungal  
340 drugs and antihypertensive drugs, appear to ameliorate sex differences in pharmacokinetics  
341 (Guo et al., 2010; Jarugula et al., 2010). As such, we suggest that where there exists an  
342 association between sex and dose, dose-response curves are likely to be sex-specific and  
343 clarification of this relationship would be supported (e.g., using meta-analysis, Zhong et al.,  
344 2017) rather than using a scaled male-specific dose response curve for females. Since many  
345 drugs are withdrawn from the market due to risks of ADRs in women, meta-analytic  
346 approaches to illuminating sex-specific dose response curves represents a viable  
347 opportunity to reducing the number of ADRs and reaching an important target set by  
348 precision medicine (Polasek et al., 2018).

349

350 ***Implications for allometric evolution***



351 The study of allometry has a long history in evolutionary biology, established as a  
352 foundational descriptor of morphological variation at ontogenetic, population and  
353 evolutionary levels (Cheverud, 1982; Klingenberg, 1998). Allometry may channel phenotypic  
354 variation in fixed directions, defining scaling relationships that persist across large  
355 evolutionary timescales. For example, craniofacial variation among mammals has been  
356 observed to be constrained by allometry, such that small mammals have shorter faces than  
357 do larger ones (Cardini & Polly, 2013; Cardini et al., 2015). Conversely, allometry may  
358 facilitate morphological diversification, acting as a line of ‘evolutionary least resistance’,  
359 allowing for new morphotypes to originate relatively rapidly among closely related species  
360 (Porto et al., 2009; Pélabon et al., 2014). These pathways (allometric constraint vs allometric  
361 facilitation) may be a start point for exploring how sex differences in disease phenotypes  
362 arise, data that have been cited as a potential unexploited resource relevant for the  
363 development of new therapies (Arnold, 2010). Studies of static allometry, as examined  
364 herein, have revealed low levels of intraspecific variation in allometric slope, which explains  
365 only a small proportion of variation in size (Voje et al., 2014), compared to variation in  
366 allometric intercept (Bonduriansky, 2007). Moreover, traits under sexual selection have also  
367 revealed low magnitudes of allometric slope change under artificial selection experiments  
368 (Egset et al., 2012) and in wild populations (Egset et al., 2011), whereas intercept changes  
369 appear clear and heritable. These differences have historically been thought to be due to  
370 underlying features of the developmental system acting as an internal constraint (Huxley  
371 1932; Gould, 1966), whereas more recent interpretations suggest that external constraint  
372 (selection) more likely acts to maintain slope invariance at the static level (Pélabon et al.,  
373 2013), which is consistent with data showing that variation occurs instead at the ontogenetic  
374 level, i.e. growth rate and ontogenetic allometric slope are evolvable (e.g., Wilson &  
375 Sánchez-Villagra, 2010; Klingenberg, 2010; Wilson, 2013). Broadly consistent with other  
376 static allometric studies, we find that where differences in allometry are present, significant  
377 intercept shifts alone are more common than are significant slope shifts (Fig. 2A compared  
378 to 2B). We focus explicitly on sex differences and observe that many traits show a  
379 combination of intercept and slope changes, as well as differences in residual variance.  
380 Aside from the evolutionary implications – that allometric slope likely does not have a high  
381 evolvability, or capacity to evolve – many of the traits examined here may show a low level  
382 of sex difference in slope because the sexes are both experiencing the same selective  
383 pressure to maintain functional size relationships across different body sizes.  
384  
385 Our meta-analytic results build a narrative of complexity in sex-based trait interactions and  
386 promote a case-specific approach to preclinical research that seeks to inform drug  
387 discovery, development and dosage. That females are not ‘small’ or ‘scaled’ males in a

388 preclinical mouse model underscores the need to include female data from the earliest  
389 experimental stages. Our results evidence the plasticity of allometry at a microevolutionary  
390 scale, revealing a pathway for sex variation in phenotypic traits, which may influence study  
391 outcomes in biomedicine.

392

## 393 **Methods**

### 394 ***Data compilation and filtering***

395 We conducted all data procedures, along with statistical analyses, in the R environment v.  
396 4.1.1 (R Development Core Team, 2021). We compiled our data set from the International  
397 Mouse Phenotyping Consortium (IMPC) ([www.mousephenotype.org](http://www.mousephenotype.org), IMPC data release  
398 10.1 June 2019), accessed in October 2019. These represent traits recorded in a high-  
399 throughput phenotyping setting whereby standard operating procedures (SOPs) are  
400 implemented in a pipeline concept. The phenotypic traits represent biomarkers used for the  
401 study of disease phenotypes (see Karp et al., 2017), collated into the following nine  
402 functional groups: behaviour, eye, hearing, heart, hematology, immunology, metabolism,  
403 morphology, and physiology, which are the IMPC's original categorization (also previously  
404 used in Zajitschek et al., 2020). These groupings were assigned in relation to the description  
405 of the procedure undertaken for data point collection and following the categorisation of  
406 pipeline events at adult stage, detailed in the International Mouse Phenotyping Resource of  
407 Standardised Screens (IMPreSS, <https://www.mousephenotype.org/impress/index>).

408

409 For the initial dataset, data points were collated for adult wildtype mice only, filtering to  
410 include non-categorical phenotypic trait values for which covariate information on sex and  
411 body weight were available. This initial dataset comprised of 2,866,345 data points for 419  
412 traits. A series of data cleaning procedures were implemented to remove data points with  
413 missing body weight, zero values for a phenotypic trait and duplicated specimen IDs. Data  
414 filtering was conducted using the R package dplyr v.1.0.7 (Wickham et al., 2021). The  
415 resulting data set comprised 2,104,497 data points for 297 phenotypic traits, all of which had  
416 corresponding body weight data, enabling us to estimate an allometric relationship between  
417 a trait of interest and body weight. For each phenotypic trait, we had the following variables  
418 (covariates): phenotyping center name (location where experimental data were collected),  
419 external sample ID (animal ID), metadata group (identifier for experimental conditions in  
420 place during the experiment), sex (male / female), weight (body weight in grams), weight  
421 days old (day on which weight was recorded), procedure name (description of the  
422 experimental procedure as in IMPReSS), parameter name (description of the recorded  
423 parameter as in IMPReSS), and data point (phenotypic trait measurement – response  
424 variable).



425

426 ***Linear mixed-effects model for static allometry***

427 The static form of allometry, the covariation of a trait with size as measured across a  
428 population of adults within a single species (Klingenberg, 1998), was quantified using a  
429 linear mixed-effects model approach (Laird & Ware, 1982). Within this framework, the  
430 relationship between phenotypic trait value and body weight, accounting for random effects  
431 associated with assignment to a metadata group and batch (defined as the date when the  
432 measurements are collected), was quantified for each of the 297 traits. Models were  
433 constructed using the function *lme* in the R package nlme v. 3.1-153 (Pinheiro et al., 2021)  
434 and applied to each phenotypic trait separately. We used the approach described by  
435 Nakagawa et al. (2017) that uses within-group centring (wgc) of the continuous predictor  
436 (i.e., weight); in this way, the intercepts ( $x = 0$ ) for each sex represents the population mean  
437 for that specific sex. Also, we calculated z-scores ( $z$ ) from the response ( $y$ ) so that all  
438 regression coefficients are directly comparable across different traits. The applied model  
439 was:

440

441  $z(\log(\text{data point})) \sim \text{wgc}(\log(\text{weight})) * \text{sex} + (1 | \text{batch}) + (\text{weight} | \text{metadata group})$

442

443 The random factor 'batch' labelled a cohort of mice that went through a procedure on the  
444 same day (see Karp et al., 2017), whereas 'metadata group' represented occasions when  
445 procedural parameters were changed (e.g., different instruments, different observers and  
446 different settings). These two random factors along with the 'weight' random slopes would  
447 reduce Type I errors due to clustering (Schielzeth & Forstmeier, 2009). Also, to estimate  
448 different residual variances between the two sexes, we modelled group-wise  
449 heteroscedasticity structure, which was defined using the *lme* function's argument `weights =`  
450 `varIdent (form = ~1 | sex)`.

451

452 For each phenotypic trait, model parameters (regression coefficients and variance  
453 components) were extracted, using R package broom.mixed v.0.2.7 (Bolker & Robinson  
454 2021), for males and females (slope, intercept, standard error, SE of slope, SE of intercept  
455 and residual variance) and corresponding  $p$  values for regression coefficients were extracted  
456 to assess the significance of sex differences in slope and intercept. Because the *lme*  
457 function did not provide statistical significance for differences in residual variances (standard  
458 deviations, SDs), we used the method developed by Nakagawa et al (2015) or the logarithm  
459 of variability ratio, which compares the difference in SDs between two groups to obtain  $p$   
460 values for residual SD differences (see also Senior et al., 2020).

461

462 We were aware that some of the 297 studied traits were strongly correlated (i.e., non-  
463 independent: e.g., traits from left and right eyes and immunological assays with  
464 hierarchically clustering and overlapping cell types). Therefore, we collapsed  $p$  values of  
465 these related traits into 181  $p$  values, using the procedure (grouping related traits or trait  
466 grouping) performed by Zajitschek et al. (2020). We employed Fisher's method with the  
467 adjustment proposed by Li and Ji (2005) implemented in the R package, poolr (Cinar &  
468 Viechtbauer, 2021), which modelled the correlation between traits; we set this correlation to  
469 0.8.

470

#### 471 ***Static allometry hypotheses and Sex-bias in allometric parameters***

472 Using parameters extracted from the above models, three scenarios were assessed (see Fig  
473 1), describing the form of sex differences in the static allometric relationship between  
474 phenotypic trait value and body weight. For a given trait, these were: a) males and females  
475 have significantly different slopes but share a similar intercept (Fig. 1A, 1D), b) males and  
476 females have significantly different intercepts but share a similar slope (Fig. 1B, 1E), c)  
477 males and females have significantly different slopes and intercepts (Fig. 1C, 1F). In  
478 addition, we assessed how many traits were significantly different in residuals SDs between  
479 the sexes. For these classifications, we used both  $p$  values from 297 traits and 181 merged  
480 trait groups.

481

482 For scenarios A – C, which represent significant differences between male and female  
483 regression slope and / or intercept parameters and cases where sex differences in SDs were  
484 significant, data were collated into functional groupings (as listed above) to assess whether,  
485 and to what extent, sex bias in parameter values and variance was present across  
486 phenotypic trait values. That is, when males and females differed significantly, we counted  
487 which sex displayed the greater parameter value (intercept, slope) and, separately, we also  
488 tallied the sex with the higher magnitude of variance. Results were pooled for phenotypic  
489 traits within a functional group and visualised using R package ggplot 2 v. 3.3.5 (Wickham  
490 2016) for scenarios A – C, resulting in one set of comparisons for parameter values, and one  
491 for variance (SD) values. We should highlight that we only used the data set with 297 traits  
492 because the directionality of some trait values became meaningless once traits were  
493 merged, although merged  $p$  values were meaningful as  $p$  values are not directional (e.g.,  
494 spending time in light side or dark side).

495

#### 496 ***Meta-analysis of differences in slopes, intercepts and residual SDs***

497 We were aware that our classification approach using  $p$  values are akin to vote counting,  
498 which has limitations (Gurevitch et al., 2018). Therefore, we conducted formal meta-analyses

499 using the following effect sizes: 1) difference between intercepts (traits mean for males and  
500 females), 2) difference between slopes and 3) differences between residuals SDs. We used  
501 corresponding SE or, more precisely, the square of SE as sampling variance. We were not  
502 able to compare the directionality of effect sizes among traits (e.g., latencies and body  
503 sizes), however our main interest in this study was whether males and females were  
504 different in intercepts, slopes and residuals SDs irrespective of directionalities. Therefore, we  
505 conducted meta-analyses of magnitudes applying the transformation to the mean and  
506 sampling variance, which assumes to follow folded normal distribution (Morrissey, 2016, eq.  
507 8), by using the formulas below:

$$ES_{folded} = SE \sqrt{\frac{2}{\pi} \exp\left(\frac{ES^2}{2SE^2}\right) + ES \left[1 - 2\Phi\left(-\frac{ES}{SE}\right)\right]}$$
$$SE_{folded}^2 = ES^2 + SE^2 - ES_{folded}^2$$

508 Where  $\Phi$  is the standard normal cumulative distribution function and  $ES_{folded}$  and  $SE_{folded}$  are,  
509 respectively, transformed effect size (point estimate) and sampling variance, while  $ES$  and  
510  $SE$  are corresponding point estimate and sampling variance before transformation.

511 Morrissey (2016) has shown that meta-analytic means using such a folding transformation  
512 are hardly biased. Therefore, these transformed variables were directly meta-analysed using  
513 the *rma.mv* function in the R package, metafor (Viechtbauer, 2010). The intercept models  
514 (meta-analytic model) had three random factors: 1) functional group, 2) traits group and 3)  
515 effect size identifier (which is equivalent to residuals in a meta-analytic model; see  
516 Nakagawa & Santos, 2012), while in the meta-regression models, we fitted functional group  
517 as a moderator (see Fig 3). The model structures for all the three effect sizes were identical.  
518 We reported parameter estimates and 95% confidence intervals, CI and 95% prediction  
519 intervals, PI, which were visualised by the R package, orchaRd (Nakagawa et al., 2021). In a  
520 meta-analysis, 95% PI represents the degree of heterogeneity as well as a likely range of an  
521 effect size for a future study. We considered the estimate statistically significant when 95%  
522 CI did not span zero.

523

### 524 **Correlations among differences in slopes, intercepts and residual SDs**

525 We also quantified correlations among the three effect sizes, using a Bayesian tri-variate  
526 meta-analytic model, implemented in the R package, brms (Burkner, 2017). We fitted  
527 functional grouping as a fixed effect and trait groups as a random effect using the function,  
528 *brm*. Notably, we have log transformed  $ES_{folded}$  and also transformed  $SE_{folded}$  using the delta  
529 method (e.g., Nakagawa et al., 2017), accordingly, before fitting effect sizes to the model.  
530 We imposed the default priors for all the parameter estimated with the settings of two chains,  
531 1,000 warm-ups and 4,000 iterations. We assessed the convergence of the chains by

532 Gelman-Rubin statistic (Gelman & Rubin, 1992), which was 1 for all chains (i.e., meaning  
533 they were all converged) and we also checked all effective sample sizes for posterior  
534 samples (all were over 800). We reported mean estimates (correlations among the three  
535 effect sizes) and 95% credible intervals (CI) and if the 95% CI did not overlap with 0, we  
536 considered the parameter statistically significantly different from 0.

537

### 538 **Data availability**

539 The R code and data generated during this study are freely accessible on GitHub at <to be  
540 inserted>. An R Markdown file with the complete workflow for all analyses is provided in the  
541 supporting information, available at <to be inserted>.

542

### 543 **References**

- 544 Arnegard, M. E., Whitten, L. A., Hunter, C., & Clayton, J. A. (2020). Sex as a biological variable: a 5-  
545 year progress report and call to action. *Journal of Women's Health*, 29(6), 858-864.
- 546 Arnold, A. P. (2010). Promoting the understanding of sex differences to enhance equity and  
547 excellence in biomedical science. *Biology of Sex Differences*, 1(1), 1.  
548 <https://doi.org/10.1186/2042-6410-1-1>
- 549 Becker, J. B., Prendergast, B. J., & Liang, J. W. (2016). Female rats are not more variable than male  
550 rats: a meta-analysis of neuroscience studies. *Biology of Sex Differences*, 7(1), 34.  
551 <https://doi.org/10.1186/s13293-016-0087-5>
- 552 Beery, A. K., & Zucker, I. (2011). Sex bias in neuroscience and biomedical research. *Neuroscience &*  
553 *Biobehavioral Reviews*, 35(3), 565-572.  
554 <https://doi.org/https://doi.org/10.1016/j.neubiorev.2010.07.002>
- 555 Bolker, B., & Robinson, D. (2021). *broom.mixed: Tidying Methods for Mixed Models*. In (Version  
556 0.2.7.) <https://CRAN.R-project.org/package=broom.mixed>
- 557 Bouman, A., Heineman, M. J., & Faas, M. M. (2005). Sex hormones and the immune response in  
558 humans. *Human Reproduction Update*, 11(4), 411-423.
- 559 Bonduriansky, R. (2007). Sexual selection and allometry: a critical reappraisal of the evidence and  
560 ideas. *Evolution: International Journal of Organic Evolution*, 61(4), 838-849.
- 561 Buch, T., Moos, K., Ferreira, F. M., Fröhlich, H., Gebhard, C., & Tresch, A. (2019). Benefits of a  
562 factorial design focusing on inclusion of female and male animals in one experiment. *Journal*  
563 *of Molecular Medicine*, 97(6), 871-877. <https://doi.org/10.1007/s00109-019-01774-0>
- 564 Bürkner, P.-C. (2017). brms: An R package for Bayesian multilevel models using Stan. *Journal of*  
565 *statistical software*, 80, 1-28.
- 566 Campesi, I., Seghieri, G., & Franconi, F. (2021). Type 2 diabetic women are not small type 2 diabetic  
567 men: Sex-and-gender differences in antidiabetic drugs. *Current Opinion in Pharmacology*,  
568 60, 40-45. <https://doi.org/https://doi.org/10.1016/j.coph.2021.06.007>
- 569 Canto, J. G., Goldberg, R. J., Hand, M. M., Bonow, R. O., Sopko, G., Pepine, C. J., & Long, T. (2007).  
570 Symptom presentation of women with acute coronary syndromes: myth vs reality. *Archives*  
571 *of internal medicine*, 167(22), 2405-2413.
- 572 Cardini, A., & Polly, P. D. (2013). Larger mammals have longer faces because of size-related  
573 constraints on skull form [Article]. *Nature Communications*, 4, 2458.  
574 <https://doi.org/10.1038/ncomms3458>
- 575 Cardini, A., Polly, D., Dawson, R., & Milne, N. (2015). Why the long face? Kangaroos and wallabies  
576 follow the same 'rule' of cranial evolutionary allometry (CREA) as placentals. *Evolutionary*  
577 *Biology*, 42(2), 169-176.

- 578 Chen, M.-L., Lee, S.-C., Ng, M.-J., Schuirmann, D. J., Lesko, L. J., & Williams, R. L. (2000).  
579 Pharmacokinetic analysis of bioequivalence trials: Implications for sex-related issues in  
580 clinical pharmacology and biopharmaceutics. *Clinical Pharmacology & Therapeutics*, 68(5),  
581 510-521. <https://doi.org/https://doi.org/10.1067/mcp.2000.111184>
- 582 Cheverud, J. M. (1982). Phenotypic, genetic, and environmental morphological integration in the  
583 cranium. *Evolution*, 36(3), 499-516.
- 584 Cinar, O., & Viechtbauer, W. (2021). *poolr: Methods for Pooling P-Values from (Dependent) Tests*. In  
585 (Version 1.0-0.) <https://CRAN.R-project.org/package=poolr>
- 586 Clayton, J. A., & Collins, F. S. (2014). Policy: NIH to balance sex in cell and animal studies. *Nature*  
587 *News*, 509(7500), 282.
- 588 Cook, I. F. (2008). Sexual dimorphism of humoral immunity with human vaccines. *Vaccine*, 26(29-30),  
589 3551-3555.
- 590 Correa-de-Araujo, R. (2006). Serious gaps: how the lack of sex/gender-based research impairs health.  
591 *Journal of Women's Health*, 15(10), 1116-1122.
- 592 Dayton, A., Exner, E. C., Bukowy, J. D., Stodola, T. J., Kurth, T., Skelton, M., Greene, A. S., & Cowley Jr,  
593 A. W. (2016). Breaking the cycle: estrous variation does not require increased sample size in  
594 the study of female rats. *Hypertension*, 68(5), 1139-1144.
- 595 Dickinson, M. E., et al. (2016). High-throughput discovery of novel developmental phenotypes.  
596 *Nature*, 537(7621), 508-514. <https://doi.org/10.1038/nature19356>
- 597 Egset, C. K., Bolstad, G. H., Rosenqvist, G., Endler, J. A., & Pélabon, C. (2011). Geographical variation  
598 in allometry in the guppy (*Poecilia reticulata*). *Journal of Evolutionary Biology*, 24(12), 2631-  
599 2638.
- 600 Egset, C. K., Hansen, T. F., Le Rouzic, A., Bolstad, G. H., Rosenqvist, G., & Pélabon, C. (2012). Artificial  
601 selection on allometry: change in elevation but not slope. *Journal of Evolutionary Biology*,  
602 25(5), 938-948. <https://doi.org/https://doi.org/10.1111/j.1420-9101.2012.02487.x>
- 603 Fadiran, E. O., & Zhang, L. (2015). Effects of sex differences in the pharmacokinetics of drugs and  
604 their impact on the safety of medicines in women. In M. Harrison-Woolrych (Ed.), *Medicines*  
605 *for women* (pp. 41-68). Springer International Publishing.
- 606 Farkas, R. H., Unger, E. F., & Temple, R. (2013). Zolpidem and Driving Impairment — Identifying  
607 Persons at Risk. *New England Journal of Medicine*, 369(8), 689-691.  
608 <https://doi.org/10.1056/NEJMp1307972>
- 609 Feldman, S., Ammar, W., Lo, K., Trepman, E., van Zuylen, M., & Etzioni, O. (2019). Quantifying Sex  
610 Bias in Clinical Studies at Scale With Automated Data Extraction. *JAMA Network Open*, 2(7),  
611 e196700-e196700. <https://doi.org/10.1001/jamanetworkopen.2019.6700>
- 612 Fernández-Liz, E., Modamio, P., Catalán, A., Lastra, C. F., Rodríguez, T., & Mariño, E. L. (2008).  
613 Identifying how age and gender influence prescription drug use in a primary health care  
614 environment in Catalonia, Spain. *British Journal of Clinical Pharmacology*, 65(3), 407-417.
- 615 Flanagan, K. L. (2014). Sexual dimorphism in biomedical research: a call to analyse by sex.  
616 *Transactions of The Royal Society of Tropical Medicine and Hygiene*, 108(7), 385-387.  
617 <https://doi.org/10.1093/trstmh/tru079>
- 618 Gandhi, M., Aweeka, F., Greenblatt, R. M., & Blaschke, T. F. (2004). Sex differences in  
619 pharmacokinetics and pharmacodynamics. *Annual Review of Pharmacology and Toxicology*,  
620 44, 499-523.
- 621 Garcia-Sifuentes, Y., & Maney, D. L. (2021). Reporting and misreporting of sex differences in the  
622 biological sciences. *eLife*, 10, e70817. <https://doi.org/10.7554/eLife.70817>
- 623 Gelman, A., & Rubin, D. B. (1992). Inference from iterative simulation using multiple sequences.  
624 *Statistical science*, 7(4), 457-472.
- 625 Gould, S. J. (1966). Allometry and size in ontogeny and phylogeny. *Biological Reviews*, 41(4), 587-  
626 638.
- 627 Greenblatt, D. J., Harmatz, J. S., Singh, N. N., Steinberg, F., Roth, T., Moline, M. L., Harris, S. C., &  
628 Kapil, R. P. (2014). Gender differences in pharmacokinetics and pharmacodynamics of

- 629 zolpidem following sublingual administration. *The Journal of Clinical Pharmacology*, 54(3),  
630 282-290.
- 631 Greenblatt, D. J., Harmatz, J. S., & Roth, T. (2019). Zolpidem and gender: Are women really at risk?  
632 *Journal of clinical psychopharmacology*, 39(3), 189-199.
- 633 Guo, T., Sun, W. J., Xia, D. Y., & Zhao, L. S. (2010). The pharmacokinetics of fluconazole in healthy  
634 Chinese adult volunteers: influence of ethnicity and gender. *Journal of Clinical Pharmacy and*  
635 *Therapeutics*, 35(2), 231-237.
- 636 Gurevitch, J., Koricheva, J., Nakagawa, S., & Stewart, G. (2018). Meta-analysis and the science of  
637 research synthesis. *Nature*, 555(7695), 175-182.
- 638 Heath, A., & Pechlivanoglou, P. Prioritizing Research in an Era of Personalized Medicine: The  
639 Potential Value of Unexplained Heterogeneity. *Medical Decision Making*, 0(0),  
640 0272989X211072858. <https://doi.org/10.1177/0272989x211072858>
- 641 Huxley, J. S. (1924). Constant differential growth-ratios and their significance. *Nature*, 114, 895-896.
- 642 Huxley, J. S. (1932). *Problems of Relative Growth*. John Hopkins University Press.
- 643 Holdcroft, A. (2007). Gender bias in research: how does it affect evidence based medicine? In: SAGE  
644 Publications Sage UK: London, England.
- 645 Jackson, S. E., & Chester, J. D. (2015). Personalised cancer medicine. *International Journal of Cancer*,  
646 137(2), 262-266. <https://doi.org/https://doi.org/10.1002/ijc.28940>
- 647 Jarugula, V., Yeh, C. M., Howard, D., Bush, C., Keefe, D. L., & Dole, W. P. (2010). Influence of body  
648 weight and gender on the pharmacokinetics, pharmacodynamics, and antihypertensive  
649 efficacy of aliskiren. *The Journal of Clinical Pharmacology*, 50(12), 1358-1366.
- 650 Javaid, M., & Haleem, A. (2018). Additive manufacturing applications in orthopaedics: A review.  
651 *Journal of Clinical Orthopaedics and Trauma*, 9(3), 202-206.  
652 <https://doi.org/https://doi.org/10.1016/j.jcot.2018.04.008>
- 653 Karp, N. A., Mason, J., Beaudet, A. L., Benjamini, Y., Bower, L., Braun, R. E., Brown, S. D., Chesler, E. J.,  
654 Dickinson, M. E., & Flenniken, A. M. (2017). Prevalence of sexual dimorphism in mammalian  
655 phenotypic traits. *Nature Communications*, 8(1), 1-12.
- 656 Kim, A. M., Tinggen, C. M., & Woodruff, T. K. (2010). Sex bias in trials and treatment must end.  
657 *Nature*, 465(7299), 688-689. <https://doi.org/10.1038/465688a>
- 658 Klein, S. L., & Poland, G. A. (2013). Personalized vaccinology: one size and dose might not fit both  
659 sexes. *Vaccine*, 31(23), 2599-2600.
- 660 Klein, S. L., Schiebinger, L., Stefanick, M. L., Cahill, L., Danska, J., de Vries, G. J., Kibbe, M. R.,  
661 McCarthy, M. M., Mogil, J. S., Woodruff, T. K., & Zucker, I. (2015). Opinion: Sex inclusion in  
662 basic research drives discovery. *Proceedings of the National Academy of Sciences*, 112(17),  
663 5257-5258. <https://doi.org/10.1073/pnas.1502843112>
- 664 Klinge, I. (2008). Gender perspectives in European research. *Pharmacological Research*, 58(3), 183-  
665 189. <https://doi.org/https://doi.org/10.1016/j.phrs.2008.07.011>
- 666 Klingenberg, C. P. (1998). Heterochrony and allometry: the analysis of evolutionary change in  
667 ontogeny. *Biological Reviews*, 73(1), 79-123. <https://doi.org/10.1017/s000632319800512x>
- 668 Klingenberg, C. P. (2010). There's something afoot in the evolution of ontogenies. *Bmc Evolutionary*  
669 *Biology*, 10, Article 221. <https://doi.org/10.1186/1471-2148-10-221>
- 670 Koren, G., Nordeng, H., & MacLeod, S. (2013). Gender differences in drug bioequivalence: time to  
671 rethink practices. *Clinical Pharmacology & Therapeutics*, 93(3), 260-262.
- 672 Laird, N. M., & Ware, J. H. (1982). Random-effects models for longitudinal data. *Biometrics*, 963-974.
- 673 Li, J., & Ji, L. (2005). Adjusting multiple testing in multilocus analyses using the eigenvalues of a  
674 correlation matrix. *Heredity*, 95(3), 221-227.
- 675 Madla, C. M., Gavins, F. K. H., Merchant, H. A., Orlu, M., Murdan, S., & Basit, A. W. (2021). Let's talk  
676 about sex: Differences in drug therapy in males and females. *Advanced Drug Delivery*  
677 *Reviews*, 175, 113804. <https://doi.org/https://doi.org/10.1016/j.addr.2021.05.014>
- 678 Mauvais-Jarvis, F., Bairey Merz, N., Barnes, P. J., Brinton, R. D., Carrero, J.-J., DeMeo, D. L., De Vries,  
679 G. J., Epperson, C. N., Govindan, R., Klein, S. L., Lonardo, A., Maki, P. M., McCullough, L. D.,

- 680 Regitz-Zagrosek, V., Regensteiner, J. G., Rubin, J. B., Sandberg, K., & Suzuki, A. (2020). Sex  
681 and gender: modifiers of health, disease, and medicine. *The Lancet*, 396(10250), 565-582.  
682 [https://doi.org/https://doi.org/10.1016/S0140-6736\(20\)31561-0](https://doi.org/https://doi.org/10.1016/S0140-6736(20)31561-0)
- 683 Mazure, C. M., & Jones, D. P. (2015). Twenty years and still counting: including women as  
684 participants and studying sex and gender in biomedical research. *BMC Women's Health*,  
685 15(1), 94. <https://doi.org/10.1186/s12905-015-0251-9>
- 686 Mogil, J. S., & Chanda, M. L. (2005). The case for the inclusion of female subjects in basic science  
687 studies of pain. *PAIN*, 117(1).  
688 [https://journals.lww.com/pain/Fulltext/2005/09000/The\\_case\\_for\\_the\\_inclusion\\_of\\_female  
689 \\_subjects\\_in.1.aspx](https://journals.lww.com/pain/Fulltext/2005/09000/The_case_for_the_inclusion_of_female_subjects_in.1.aspx)
- 690 Morrissey, M. B. (2016). Meta-analysis of magnitudes, differences and variation in evolutionary  
691 parameters. *Journal of Evolutionary Biology*, 29(10), 1882-1904.
- 692 Morrow, E. H. (2015). The evolution of sex differences in disease. *Biology of Sex Differences*, 6(1), 5.  
693 <https://doi.org/10.1186/s13293-015-0023-0>
- 694 Morrow, E. H., & Connallon, T. (2013). Implications of sex-specific selection for the genetic basis of  
695 disease. *Evolutionary Applications*, 6(8), 1208-1217.
- 696 Nakagawa, K., & Kajiwara, A. (2015). Female sex as a risk factor for adverse drug reactions. *Nihon  
697 rinsho. Japanese journal of clinical medicine*, 73(4), 581-585.
- 698 Nakagawa, S., & Santos, E. S. (2012). Methodological issues and advances in biological meta-analysis.  
699 *Evolutionary Ecology*, 26(5), 1253-1274.
- 700 Nakagawa, S., Poulin, R., Mengersen, K., Reinhold, K., Engqvist, L., Lagisz, M., & Senior, A. M. (2015).  
701 Meta-analysis of variation: ecological and evolutionary applications and beyond. *Methods in  
702 Ecology and Evolution*, 6(2), 143-152.
- 703 Nakagawa, S., Johnson, P. C. D., & Schielzeth, H. (2017). The coefficient of determination  $R^2$  and  
704 intra-class correlation coefficient from generalized linear mixed-effects models revisited and  
705 expanded. *Journal of The Royal Society Interface*, 14(134), 20170213.  
706 <https://doi.org/doi:10.1098/rsif.2017.0213>
- 707 Nakagawa, S., Kar, F., O'Dea, R. E., Pick, J. L., & Lagisz, M. (2017). Divide and conquer? Size  
708 adjustment with allometry and intermediate outcomes. *BMC biology*, 15(1), 1-6.
- 709 Nakagawa, S., Lagisz, M., O'Dea, R. E., Rutkowska, J., Yang, Y., Noble, D. W. A., & Senior, A. M. (2021).  
710 The orchard plot: Cultivating a forest plot for use in ecology, evolution, and beyond.  
711 *Research Synthesis Methods*, 12(1), 4-12. <https://doi.org/https://doi.org/10.1002/jrsm.1424>
- 712 NIH, 1993. Revitalization Act of 1993, PL 103-43. Available at  
713 [grants.nih.gov/grants/funding/women\\_min/guidelines\\_amended\\_10\\_2001.htm001.htm](https://grants.nih.gov/grants/funding/women_min/guidelines_amended_10_2001.htm001.htm)
- 714 Oh, S. S., Galanter, J., Thakur, N., Pino-Yanes, M., Barcelo, N. E., White, M. J., de Bruin, D. M.,  
715 Greenblatt, R. M., Bibbins-Domingo, K., Wu, A. H. B., Borrell, L. N., Gunter, C., Powe, N. R., &  
716 Burchard, E. G. (2015). Diversity in Clinical and Biomedical Research: A Promise Yet to Be  
717 Fulfilled. *PLOS Medicine*, 12(12), e1001918. <https://doi.org/10.1371/journal.pmed.1001918>
- 718 Pélabon, C., Bolstad, G. H., Egset, C. K., Cheverud, J. M., Pavlicev, M., & Rosenqvist, G. (2013). On the  
719 relationship between ontogenetic and static allometry. *The American Naturalist*, 181(2),  
720 195-212.
- 721 Prendergast, B. J., Onishi, K. G., & Zucker, I. (2014). Female mice liberated for inclusion in  
722 neuroscience and biomedical research. *Neuroscience & Biobehavioral Reviews*, 40, 1-5.  
723 <https://doi.org/https://doi.org/10.1016/j.neubiorev.2014.01.001>
- 724 Pinheiro, J., Bates, D., DebRoy, S., Sarkar, D., & Team, R. C. (2021). nlme: Linear and Nonlinear Mixed  
725 Effects Models. In (Version 3.1-153) <https://CRAN.R-project.org/package=nlme>
- 726 Polasek, T. M., Shakib, S., & Rostami-Hodjegan, A. (2018). Precision dosing in clinical medicine:  
727 present and future. *Expert Review of Clinical Pharmacology*, 11(8), 743-746.  
728 <https://doi.org/10.1080/17512433.2018.1501271>

- 729 Porto, A., de Oliveira, F. B., Shirai, L. T., De Conto, V., & Marroig, G. (2009). The Evolution of  
730 Modularity in the Mammalian Skull I: Morphological Integration Patterns and Magnitudes.  
731 *Evolutionary Biology*, 36(1), 118-135. <https://doi.org/10.1007/s11692-008-9038-3>  
732 Rademaker, M. (2001). Do women have more adverse drug reactions? *American journal of clinical*  
733 *dermatology*, 2(6), 349-351.
- 734 Rathore, S. S., Wang, Y., & Krumholz, H. M. (2002). Sex-based differences in the effect of digoxin for  
735 the treatment of heart failure. *New England Journal of Medicine*, 347(18), 1403-1411.
- 736 Rawlik, K., Canela-Xandri, O., & Tenesa, A. (2016). Evidence for sex-specific genetic architectures  
737 across a spectrum of human complex traits. *Genome biology*, 17(1), 1-8.
- 738 Regitz-Zagrosek, V., & Kararigas, G. (2017). Mechanistic pathways of sex differences in cardiovascular  
739 disease. *Physiological reviews*, 97(1), 1-37.
- 740 Rogers, W. A., & Ballantyne, A. J. (2008). Exclusion of Women From Clinical Research: Myth or  
741 Reality? *Mayo Clinic Proceedings*, 83(5), 536-542.  
742 <https://doi.org/https://doi.org/10.4065/83.5.536>
- 743 Schielzeth, H., & Forstmeier, W. (2009). Conclusions beyond support: overconfident estimates in  
744 mixed models. *Behavioral ecology*, 20(2), 416-420.
- 745 Senior, A. M., Viechtbauer, W., & Nakagawa, S. (2020). Revisiting and expanding the meta-analysis of  
746 variation: The log coefficient of variation ratio. *Research Synthesis Methods*, 11(4), 553-567.
- 747 Sex, T., & Group, G. S. R. C. t. A. (2020). Sex and gender in health research: updating policy to reflect  
748 evidence. *Medical Journal of Australia*, 212(2), 57-62.e51.  
749 doi:<https://doi.org/10.5694/mja2.50426>
- 750 Shansky, R. M. (2019). Are hormones a female problem for animal research? *Science*, 364(6443),  
751 825-826. <https://doi.org/doi:10.1126/science.aaw7570>
- 752 Soldin, O. P., & Mattison, D. R. (2009). Sex Differences in Pharmacokinetics and Pharmacodynamics.  
753 *Clinical Pharmacokinetics*, 48(3), 143-157. [https://doi.org/10.2165/00003088-200948030-](https://doi.org/10.2165/00003088-200948030-00001)  
754 [00001](https://doi.org/10.2165/00003088-200948030-00001)
- 755 Tannenbaum, C., Ellis, R. P., Eyssel, F., Zou, J., & Schiebinger, L. (2019). Sex and gender analysis  
756 improves science and engineering. *Nature*, 575(7781), 137-146.
- 757 Team, R. C. (2019). R: A language and environment for statistical computing. In *R Foundation for*  
758 *Statistical Computing*. <http://www.R-project.org>
- 759 Usui, T., Macleod, M. R., McCann, S. K., Senior, A. M., & Nakagawa, S. (2021). Meta-analysis of  
760 variation suggests that embracing variability improves both replicability and generalizability  
761 in preclinical research. *PLoS Biology*, 19(5), e3001009.
- 762 Van Hoof, J. (2015). Female thermal demand. *Nature Climate Change*, 5(12), 1029-1030.
- 763 Viechtbauer, W. (2010). Conducting meta-analyses in R with the metafor package. *Journal of*  
764 *statistical software*, 36(3), 1-48.
- 765 Voje, K. L., Hansen, T. F., Egset, C. K., Bolstad, G. H., & Pélabon, C. (2014). Allometric constraints and  
766 the evolution of allometry. *Evolution*, 68(3), 866-885. <https://doi.org/10.1111/evo.12312>
- 767 Wallach, J. D., Sullivan, P. G., Trepanowski, J. F., Steyerberg, E. W., & Ioannidis, J. P. (2016). Sex based  
768 subgroup differences in randomized controlled trials: empirical evidence from Cochrane  
769 meta-analyses. *bmj*, 355.
- 770 Whitley, H. P., & Lindsey, W. (2009). Sex-based differences in drug activity. *American Family*  
771 *Physician*, 80(11), 1254-1258.
- 772 Wickham, H. (2016). *ggplot2: Elegant Graphics for Data Analysis*. Springer-Verlag.  
773 <https://ggplot2.tidyverse.org>
- 774 Wickham, H., François, R., Henry, L., & Müller, K. (2021). *dplyr: A Grammar of Data Manipulation*. In  
775 (Version 1.0.7) <https://CRAN.R-project.org/package=dplyr>
- 776 Wiemann, L. M., Vallarta-Ast, N., Krueger, D., & Binkley, N. (2007). Effect of female database use for  
777 T-score derivation in men. *Journal of Clinical Densitometry*, 10(3), 244-248.



- 778 Wilson, L. A. B., & Sánchez-Villagra, M. R. (2010). Diversity trends and their ontogenetic basis: an  
779 exploration of allometric disparity in rodents. *Proc R Soc Lond B Biol Sci*, 277.  
780 <https://doi.org/10.1098/rspb.2009.1958>
- 781 Wilson, L. A. (2013). Allometric disparity in rodent evolution. *Ecology and Evolution*, 3(4), 971-984.
- 782 Voitowich, N. C., Beery, A., & Woodruff, T. (2020). A 10-year follow-up study of sex inclusion in the  
783 biological sciences. *eLife*, 9, e56344. <https://doi.org/10.7554/eLife.56344>
- 784 Yang, L., Li, Y., Hong, H., Chang, C.-W., Guo, L.-W., Lyn-Cook, B., Shi, L., & Ning, B. (2012). Sex  
785 differences in the expression of drug-metabolizing and transporter genes in human liver.  
786 *Journal of drug metabolism & toxicology*, 3(3).
- 787 Yu, Y., Chen, J., Li, D., Wang, L., Wang, W., & Liu, H. (2016). Systematic analysis of adverse event  
788 reports for sex differences in adverse drug events. *Scientific Reports*, 6(1), 1-9.
- 789 Zajitschek, S. R. K., Zajitschek, F., Bonduriansky, R., Brooks, R. C., Cornwell, W., Falster, D. S., Lagisz,  
790 M., Mason, J., Senior, A. M., Noble, D. W. A., & Nakagawa, S. (2020). Sexual dimorphism in  
791 trait variability and its eco-evolutionary and statistical implications. *eLife*, 9, e63170.  
792 <https://doi.org/10.7554/eLife.63170>
- 793 Zucker, I., & Beery, A. K. (2010). Males still dominate animal studies. *Nature*, 465(7299), 690-690.  
794 <https://doi.org/10.1038/465690a>
- 795 Zucker, I., & Prendergast, B. J. (2020). Sex differences in pharmacokinetics predict adverse drug  
796 reactions in women. *Biology of Sex Differences*, 11(1), 32. [https://doi.org/10.1186/s13293-](https://doi.org/10.1186/s13293-020-00308-5)  
797 [020-00308-5](https://doi.org/10.1186/s13293-020-00308-5)
- 798 Zucker, I., Prendergast, B. J., & Beery, A. K. (2021). Pervasive Neglect of Sex Differences in Biomedical  
799 Research. *Cold Spring Harbor Perspectives in Biology*, a039156.

800

## 801 **Acknowledgements**

802 This research was supported by Australian Research Council grants DP200100361 awarded  
803 to SN and ML and FT200100822 awarded to LABW. Research reported in this publication  
804 was supported by the European Molecular Biology Laboratory core funding and the National  
805 Human Genome Research Institute of the National Institutes of Health under Award Number  
806 UM1HG006370. The content is solely the responsibility of the authors and does not  
807 necessarily represent the official views of the National Institutes of Health.

808

## 809 **Author contributions**

810 LABW and SN designed the research; SN, LABW, SRKZ, ML and HH contributed to the  
811 conception and implementation of data analysis; JM contributed to data acquisition; LABW  
812 drafted the manuscript with contributions from SN and ML.

813

## 814 **Competing interests**

815 The authors declare no competing interests.

816
